# Supplementary material for: Thyroid-Disrupting Activities of Groundwater from a Riverbank Filtration System in Wuchang City, China: Seasonal Distribution and Human Health Risk Assessment
Source: Hindawi journal article supplement (doi:10.1155/2020/2437082), 2020-01-07
Supplement: f1 [file 2437082.f1.pdf]

1 **Journal of Chemistry**

2 **Thyroid Disrupting Activities of Groundwater from a Riverbank**  
3 **Filtration System in Wuchang City, China: Seasonal Distribution**  
4 **and Human Health Risk Assessment**

5 Dongdong Kong<sup>1</sup>, Hedan Liu<sup>1</sup>, Yun Liu<sup>2</sup>, Yafei Wang<sup>1</sup> and Jian Li<sup>1\*</sup>

6 <sup>1</sup>Engineering Research Center of Groundwater Pollution Control and Remediation, Ministry  
7 of Education, College of Water Sciences, Beijing Normal University, Beijing 100875, China.

8 <sup>2</sup>South China Institute of Environmental Science, MEE., No.7 West Street, Yuancun,  
9 Guangzhou 510655, China

10 \* Correspondence should be addressed to Jian Li; [lijian@bnu.edu.cn](mailto:lijian@bnu.edu.cn)

## 11 Supplementary Materials

### 12 Appendix A

#### 13 A1 Inhibition activity of $\beta$ -galactosidase by organic extracts of water samples

14 To identify whether the water samples affect  $\beta$ -galactosidase activity,  $\beta$ -galactosidase and o-  
 15 Nitrophenol- $\beta$ -galactopyranoside (ONPG) were first combined, and showed a significant  
 16 yellow color. The mixture was diluted until its  $\beta$ -galactosidase activity (u) was nearly the  
 17 same to the  $\beta$ -galactosidase activity (u) induced by T3 in the TR yeast bioassay. Then the  
 18 organic extracts of soil samples were incubated with the mixture ( $\beta$ -galactosidase + ONPG)  
 19 (1/200, v/v). Comparing with the blank ( $\beta$ -galactosidase + ONPG), it showed no inhibition  
 20 activity (Fig. A1). Thus the water samples do not affect  $\beta$ -galactosidase activity.

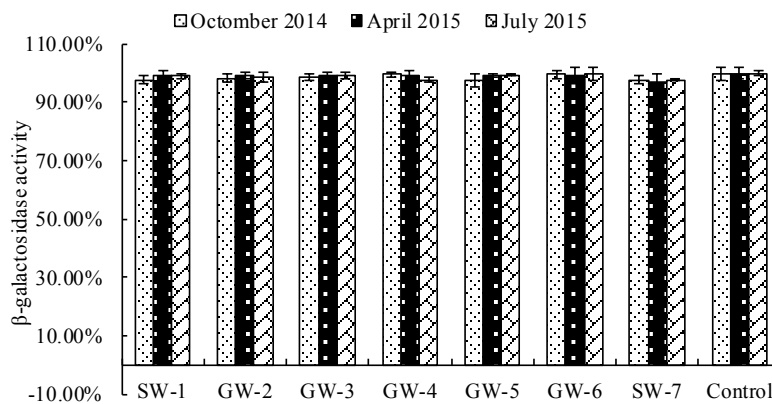

21

22 Figure A1 Inhibition of  $\beta$ -galactosidase activity by organic extracts of water samples. Data are representative of  
 23 three independent experiments with three replicates.

#### 24 A2 Cytotoxicity of the organic extracts of water samples

25 To ensure that increased/reduced activities in the bioassay were caused by true agonistic/  
 26 antagonistic responses and not by cytotoxicity, viability was measured in yeast cells exposed  
 27 to water samples without T3 (TR agonist activity) and in the presence of T3 (TR antagonistic  
 28 activity). Yeast cells were plated, and then exposed for 2 h to water samples. And cell  
 29 viability was determined spectrophotometrically as a change of cell density ( $OD_{600}$ ) in the  
 30 assay medium. The cytotoxicity of the samples is represented as the percent inhibition  
 31 activity ( $1 - OD_{600\text{-exposure medium}} / OD_{600\text{-blank medium}}$ ). The results showed that there was no  
 32 significant change in yeast cell viability (Fig. A2).

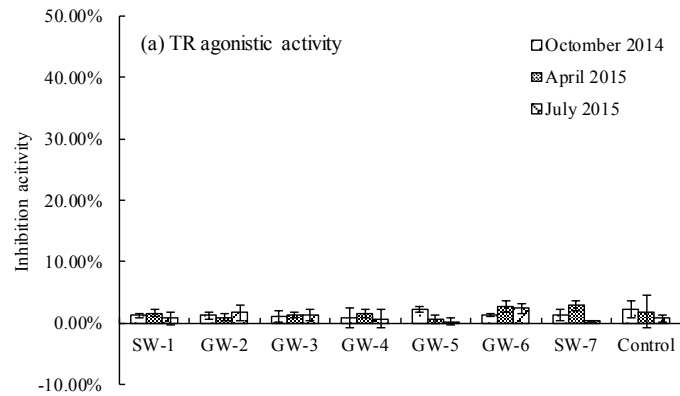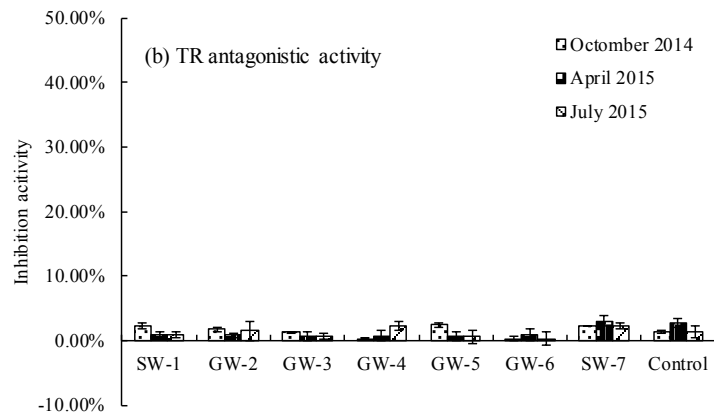

35 Figure A2 Cytotoxicity of the water samples. The cytotoxicity of the samples is represented as the percent  
 36 inhibition activity. Data are representative of three independent experiments with three replicates.

### 37 A3 The levels of T3 and T4 in different age and gender groups

38 The levels of T3 and T4 in different age and gender groups were shown in Table A1 [32] and  
 39 a risk assessment was performed in this study, to compare the levels of exposure in the  
 40 samples with the suggested sum of T3 and thyroxine (T4) in Table A1.

41

42

Table A1 T3 and T4 in different age and gender groups (nmol/L)[32]

|             | T3      |         | T4      |         | T4<br>T3 equivalent level <sup>3</sup> |         |
|-------------|---------|---------|---------|---------|----------------------------------------|---------|
|             | minimum | maximum | minimum | maximum | minimum                                | maximum |
| Male        |         |         |         |         |                                        |         |
| 20-44 years | 1.41    | 2.60    | 74.07   | 144.69  | 30.18                                  | 58.95   |
| 45-59 years | 1.34    | 2.57    | 71.93   | 143.50  | 29.30                                  | 58.46   |
| 60-90 years | 1.38    | 2.56    | 69.34   | 145.46  | 28.25                                  | 59.26   |
| Female      |         |         |         |         |                                        |         |
| 20-44 years | 1.35    | 2.42    | 77.37   | 145.44  | 31.52                                  | 59.25   |
| 45-59 years | 1.38    | 2.34    | 68.82   | 142.70  | 28.04                                  | 58.14   |
| 60-90 years | 1.33    | 2.44    | 79.68   | 150.24  | 32.46                                  | 61.21   |

<sup>3</sup> The calculation from T4 to T3 equivalent level was described as follow.

43 The recombinant TR gene yeast assay revealed that T3 and T4 acted as TR agonists in  
 44 concentration-dependent manners with the median effective concentration values of T3 and  
 45 T4 being  $1.10 \times 10^{-7}$  and  $2.70 \times 10^{-7}$  mol/L, respectively [28]. Based on the above results, the  
 46 T3 equivalent level of T4 was calculated by the equation as below.

$$\text{T3 equivalent level} = C_{T3\text{-median}}/C_{T4\text{-median}} \times C_{T4} \quad (\text{A1})$$

47  $C_{T3\text{-median}}$  means the median effective concentration values of T3;  $C_{T4\text{-median}}$  means the median  
 48 effective concentration values of T4;  $C_{T4}$  means the concentration values of T4.

49 The recombinant TR gene yeast assay revealed that amiodarone hydrochloride (AH) and  
 50 dibutyl phthalate (DBP) acted as TR anti-agonists in concentration-dependent manners with  
 51 RIC 20 (concentration reducing 20% of the maximum effect) values of AH and DBP being  
 52  $2.40 \times 10^{-7}$  and  $1.00 \times 10^{-7}$  mol/L, respectively [9,28]. Above all, AH equivalent level of DBP  
 53 was calculated by the equation as below.

$$\text{AH equivalent level} = C_{\text{AH-RIC20}}/C_{\text{DBP-RIC20}} \times C_{\text{DBP}} \quad (\text{A2})$$

54  $C_{\text{AH-RIC20}}$  means the RIC20 values of AH;  $C_{\text{DBP-RIC20}}$  means the RIC20 values of DBP;  $C_{\text{DBP}}$   
 55 means the concentration values of DBP.
